RESEARCH ARTICLE

# Stranding Events of *Kogia* Whales along the Brazilian Coast

Jailson F. Moura<sup>1\*</sup>, Esteban Acevedo-Trejos<sup>1</sup>, Davi C. Tavares<sup>2,3</sup>, Ana C. O. Meirelles<sup>4</sup>, Cristine P. N. Silva<sup>4</sup>, Larissa R. Oliveira<sup>5,6</sup>, Roberta A. Santos<sup>7</sup>, Janaína C. Wickert<sup>5,8</sup>, Rodrigo Machado<sup>5,9</sup>, Salvatore Siciliano<sup>3</sup>, Agostino Merico<sup>1,10</sup>

**1** Leibniz Center for Tropical Marine Ecology - ZMT, Bremen, Germany, **2** Laboratório de Ciências Ambientais, Universidade Estadual do Norte Fluminense – UENF, Programa de Pós-Graduação em Ecologia e Recursos Naturais, Campos dos Goytacazes, RJ, Brazil, **3** Escola Nacional de Saúde Pública – ENSP, Departamento de Endemias, Fundação Oswaldo Cruz – Fiocruz, Grupo de Estudos de Mamíferos Marinhos da Região dos Lagos - GEMM-Lagos, Rio de Janeiro, RJ, Brazil, **4** Associação de Pesquisa e Preservação de Ecossistemas Aquáticos - AQUASIS, SESC Iparana, Caucaia, CE, Brazil, **5** Laboratório de Ecologia de Mamíferos, Universidade do Vale do Rio dos Sinos - UNISINOS, São Leopoldo, RS, Brazil, **6** Grupo de Estudos de Mamíferos Aquáticos do Rio Grande do Sul – GEMARS, Osório, RS, Brazil, **7** Centro de Pesquisa e Gestão dos Recursos Pesqueiros do Litoral Sudeste e Sul – CEPESUL, Instituto Chico Mendes de Conservação da Biodiversidade - ICMBio, Itajaí, SC, Brazil, **8** Laboratório de Sistemática e Ecologia de Aves e Mamíferos Marinhos – LABSMAR, Universidade Federal do Rio Grande do Sul – UFRGS, Departamento de Zoologia, Porto Alegre, RS, Brazil, **9** Universidade Federal do Rio Grande do Sul – UFRGS, Pós-Graduação em Biologia Animal, Porto Alegre, RS, Brazil, **10** Faculty of Physics & Earth Sciences, Jacobs University, Bremen, Germany

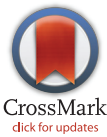

OPEN ACCESS

**Citation:** Moura JF, Acevedo-Trejos E, Tavares DC, Meirelles ACO, Silva CPN, Oliveira LR, et al. (2016) Stranding Events of *Kogia* Whales along the Brazilian Coast. PLoS ONE 11(1): e0146108. doi:10.1371/journal.pone.0146108

**Editor:** Brian Lee Beatty, New York Institute of Technology College of Osteopathic Medicine, UNITED STATES

**Received:** July 17, 2015

**Accepted:** December 14, 2015

**Published:** January 5, 2016

**Copyright:** © 2016 Moura et al. This is an open access article distributed under the terms of the [Creative Commons Attribution License](https://creativecommons.org/licenses/by/4.0/), which permits unrestricted use, distribution, and reproduction in any medium, provided the original author and source are credited.

**Data Availability Statement:** All relevant data are within the paper and its Supporting Information files.

**Funding:** JFM and AM were supported by the Alexander von Humboldt Foundation and Coordenação de Aperfeiçoamento de Pessoal de Nível Superior (CAPES, project number BEX 0128/14-7). LRO was supported by the "Conselho Nacional de Desenvolvimento Científico e Tecnológico" (CNPq) and "Fundação Grupo Boticário de Proteção à Natureza". ACOM and CPNS were sponsored by the "Programa Petrobras Ambiental". The funders had no role in study design, data collection and

\* [jailson.moura@leibniz-zmt.de](mailto:jailson.moura@leibniz-zmt.de)

## Abstract

The genus *Kogia*, which comprises only two extant species, *Kogia sima* and *Kogia breviceps*, represents one of the least known groups of cetaceans in the global ocean. In some coastal regions, however, stranding events of these species have been relatively common over the last decades. Stranding provides the opportunity to investigate the biology of these cetaceans and to explore the epidemiological aspects associated with the mortality of the organisms found on the beach. A number of disturbances (including pelagic fisheries, chemical pollution, boat strikes, and noise pollution) have been confirmed to pose a particular threat to the *Kogia* species. However, no study has yet investigated potential relationships between environmental conditions and stranding events. Here we analyse how a collection of environmental, physical, and biological variables, such as wind, sea surface temperature (SST), water depth, and chlorophyll-a, correlate to *Kogia* stranding events along the Brazilian coast. The results of our statistical analyses suggest that *K. sima* is more likely found in warm tropical waters, which provide an explanation for the high frequency of stranding in northeastern Brazilian coast. In contrast, *K. breviceps* appears to have a preference for temperate and productive waters. Wind speed results to be also an important factor for predicting *Kogia* strandings in Brazilian coast. Additionally, literature information in combination with our own data and analyses of stomach contents confirms that oceanic cephalopods constitute the primary nutritional source of both *Kogia* species. By using the available information as a qualitative proxy for habitat preference and feeding ecology, our

analysis, decision to publish, or preparation of the manuscript.

**Competing Interests:** The authors have declared that no competing interests exist.

study provides a novel and comprehensive assessment of *Kogia* stranding data in relation to environmental conditions along the Brazilian coast.

## Introduction

The genus *Kogia* comprises only two extant species, the pygmy sperm whale (*Kogia breviceps*, de Blainville 1838) and the dwarf sperm whale (*Kogia sima*, Owen 1866). These two species are considered different since 1966 after extensive morphological analyses of cranium, skeleton and external characteristics have pinpointed relevant taxonomic dissimilarities between them [1]. Subsequent studies based also on morphological and molecular analyses have confirmed this taxonomic classification [2–4].

Dwarf and pygmy sperm whales inhabit offshore tropical, subtropical and temperate waters of the world ocean [4]. However, *K. sima* appears to prefer warm waters, while *K. breviceps* is present in both tropical and temperate waters [2,4,5]. According to Caldwell and Caldwell [5], both *Kogia* species inhabit oceanic waters near continental shelves and slopes, albeit *K. breviceps* can be also found further off shore.

Although rarely observed at sea due to their oceanic habits and inconspicuous behaviour [6], estimates in the western North Atlantic and northern Gulf of Mexico suggest alarmingly small populations in these regions, about 850 individuals when considering both species combined [7]. In light of these small numbers, anthropogenic threats such as pelagic fisheries, chemical pollution, boat strikes, and noise pollution [8,9] represent a risk for the long-term viability of these species. Moreover, as apex predators with low reproductive rates, marine mammals are very sensitive to human-driven perturbations [10].

Given the difficulties to observe these whales in their natural habitats, the examination of stranding events represent a valuable opportunity not only to investigate the causes of mortality but also to better understand their ecology [8]. In fact, most of the information on the ecology and biology of these species has been inferred from stranding events [4,11,12].

The monitoring of stranding events is conducted in many coastal environments around the world, including Brazil, and represents an effective approach for investigating the ecology and epidemiology of marine mammals [8,13]. If analysed carefully, for example by minimising inherent biases, stranding data may provide relevant information on the status, distribution, and seasonal abundance of marine mammals and the potential links with environmental changes [14–17].

Most of the existing knowledge about the distribution of *Kogia* species is based on descriptive assessments of whales washed ashore. However, no study has yet investigated the potential relationships between environmental variables and the spatial distribution of strandings events. Understanding how environmental variables can potentially contribute to strandings of marine mammals is relevant for conservation and management efforts, especially in the current context of rapid environmental degradation and climate change [14,16,18,19].

Along the Brazilian coast, the *Kogia* species are among the least known cetaceans. Muñoz-Hincapié et al. [20] reviewed stranding data from South America, and found only 18 occurrences in Brazil between 1965 and 1997. Since 1998, more stranding events have been recorded through beach monitoring programs [21–29]. Studies on feeding ecology and based on the assessment of stomach contents worldwide, indicate that the *Kogia* feed primarily on deep-water organisms, mainly cephalopods, and to a less extent on fish and shrimps [5,30]. Santos

and Haimovici [23] analysed the stomach content of *Kogia* specimens stranded in Brazil and obtained results corroborating the preference for oceanic cephalopods.

Here we investigate how a number of environmental, physical, and biological variables, such as wind, sea surface temperature, ocean topography, and chlorophyll-a, contribute to *Kogia* stranding events along the Brazilian coast and analyse information on habitat preferences and dissimilarities between these species. Moreover, we explore the spatial and temporal distribution of stranding and provide relevant information about feeding habits.

## Materials and Methods

### Study area

The study area comprises the entire Brazilian coast, about 9,200 km of coastline situated between latitudes 5°N and 34°S (Fig 1). The Brazilian coast is influenced by three main current systems: the Northern Brazil Current (NBC), the Brazil Current (BC) and the Malvinas Current (MC) [31]. The NBC and BC originate by the bifurcation of the westward trans-Atlantic South Equatorial Current, at about 10°S. The NBC transports warm subtropical waters northward along the Brazilian coast, across the Equatorial region and into the Northern Hemisphere. The BC carries salty and warm waters southward along the Brazilian coast and down to about 38°S, where it converges eastward with the Malvinas Current [31]. The MC originates from the Circumpolar Current that carries cold waters northward through the continental shelf of Argentina and Uruguay.

The northern portion of the South American continental shelf (0–5°S) is considerably large and is influenced by freshwater (100,000–220,000 m<sup>3</sup> s<sup>-1</sup>) and sediment (11–13 x 10<sup>8</sup> tons year<sup>-1</sup>) discharge from the Amazon River. The coastal region from about 2°S to 6°S has been described as semi-arid [32] because of its oligotrophic waters. The northeastern portion of the coast (5–15°S) is characterised by a markedly narrow continental shelf with a steep slope.

The coastal topography from about 16°S to about 20°S presents a broad shelf with the formation of the Royal Charlotte and Abrolhos Banks. The southern part of this region (up until 23°S) is characterised by a relatively narrow continental shelf. The region from Cabo Frio (23°S) to Cabo de Santa Marta Grande (28°40'S), the South Brazil Bight (SBB), presents a complex oceanographic profile with pronounced hydrographic variations and high productivity associated with upwelling regimes [33].

The region of Cabo Frio and its surroundings is influenced by the coastal upwelling of the deep South Atlantic Central Water (SACW), triggered by factors such as changes in coastal directions from north-south to east-west, near shore proximity of the 100 m isobath, and prevalence of north/northeast winds, especially during spring and summer [34,35]. The cold (~18°C), nutrient-rich waters of the SACW regularly influences the entire inner continental shelf of the SBB [33]. The continental shelf is broader from Cabo de Santa Marta Grande to the southern end of the Brazilian coast, and extends progressively southward to the edge of the continent, along the Uruguayan and Argentinean coasts [36].

### Ethics statement

The data collection approach, which included dead stranded animals, is under the protocol and regulations established by the Brazilian Stranding Network of Aquatic Mammals (REMAB) that is coordinated by the National Centre for Research and Conservation of Aquatic Mammals (CMA-ICMBio) from the Brazilian Ministry of the Environment (MMA) (<http://www.icmbio.gov.br/cma>). This study was approved by the Chico Mendes Institute for Biodiversity Conservation (ICMBio), and conducted under SISBIO license #32550–2. Both

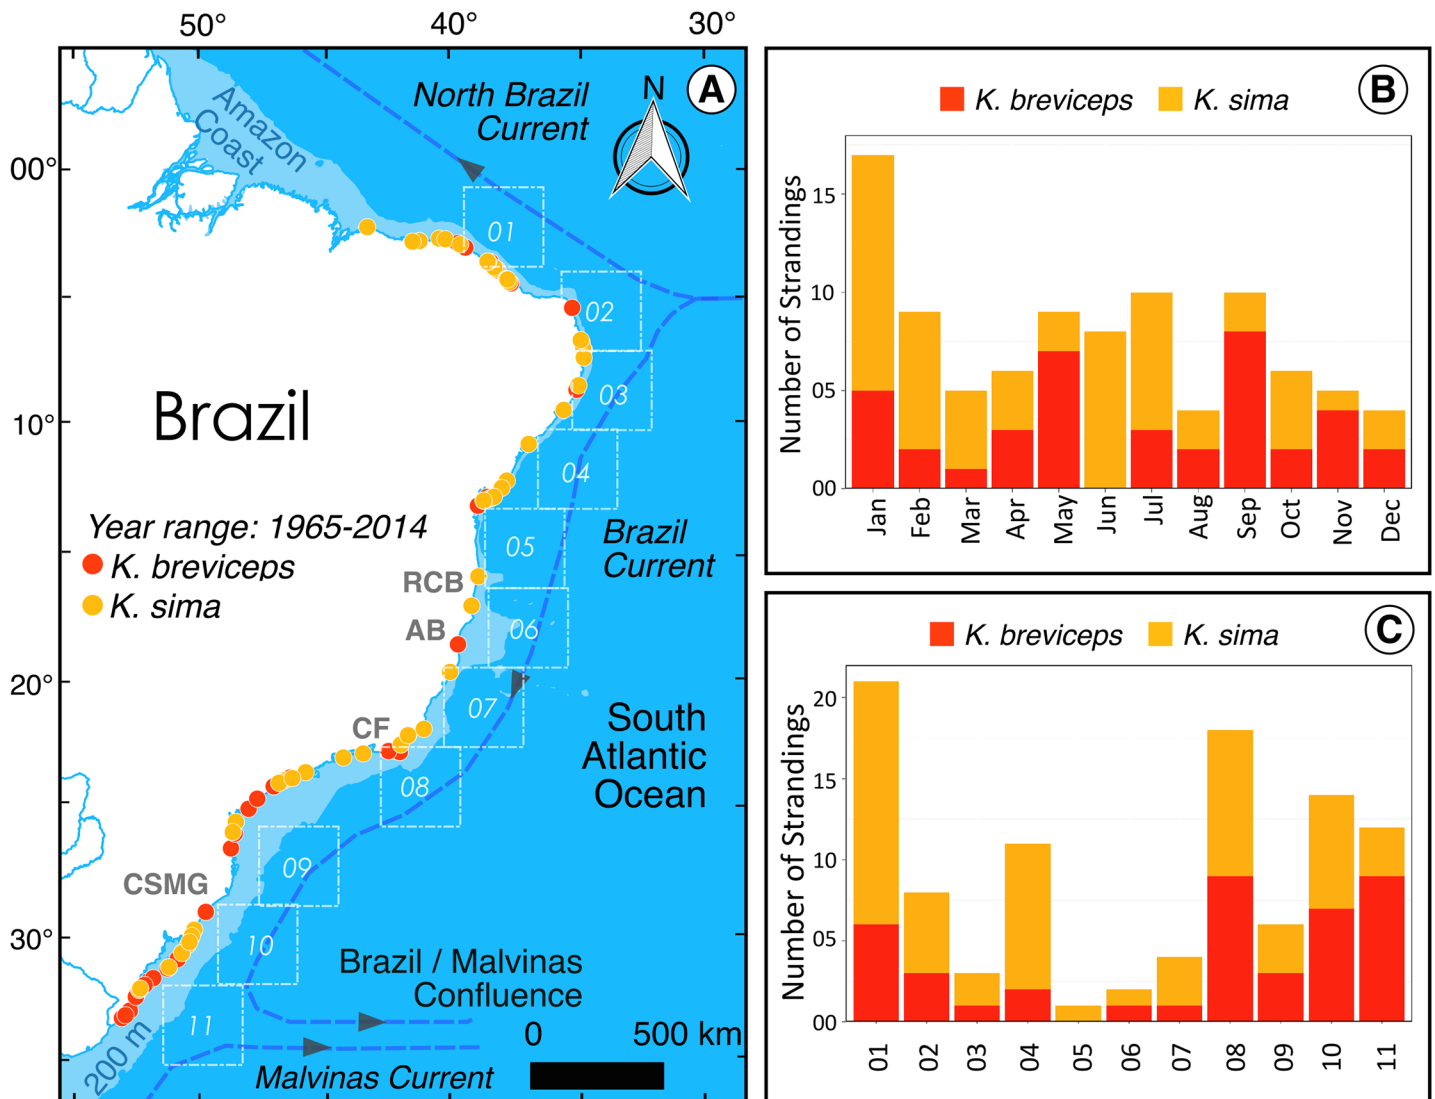

**Fig 1. Synoptic map.** Panel A shows the spatial distribution of stranding events of the *Kogia* whales (42 and 58 for *K. breviceps* and *K. sima*, respectively) from 1965 to 2014, the latitudinal sampling boxes (dashed white squares), from where we extracted mean values of environmental variables, adjacent to stranding zones, and important sites (RCB = Royal Charlotte Bank; AB = Abrolhos Bank; CF = Cabo Frio; CSMG = Cabo de Santa Marta Grande). Panel B shows the monthly occurrences of stranding events and panel C shows the number of strandings adjacent to the sampling boxes.

doi:10.1371/journal.pone.0146108.g001

*Kogia* species are actually categorized as “Data Deficient” with undefined population trends on the IUCN Red List of Threatened Species (<http://www.iucnredlist.org>).

### Stranding events and environmental data

To study the stranding distribution patterns of the genus *Kogia* along the Brazilian coast, we compiled both published and unpublished information to produce a database of strandings from 1965 to 2014. The database includes data obtained from beach monitoring programmes along the Brazilian coast (IBAMA, 2001) and from literature survey (through an extensive search in Web of Science and Scopus). The data were carefully selected and only reliable information was considered. Specifically, we polled together information provided by specialists on marine mammals or data confirmed by a thorough taxonomical examination (e.g. skull

examinations and photographs, [S1 Table](#)). Records with doubtful species identification or without satisfactory taxonomic material were excluded. When carcasses could not be identified on a species level but were recognized as belonging to the genus *Kogia* and biological tissue was available, we run a molecular procedure through the amplification of the segments of the cytochrome c oxidase I gene (COI) and the mitochondrial tRNA<sup>thr</sup>-control region (for details see Kocher et al. [37] and Ivanova et al. [38]). Sequence similarity and species identification based on COI and control region genes were obtained by comparison of similarity values to the sequences deposited at the GenBank using BLASTn (NCBI, available online). Additionally, to validate the reliability of the taxonomic identifications, we performed genetic analysis in selected samples from both species of *Kogia* that were previously recognized based on external or skull morphology. The collected information included date of event, location, sex, body length, evidence of human-related death (e.g. bycatch) [8].

We also compiled climatological data from a number of freely available environmental variables, which were used as predictors in the analysis of the stranding events. The environmental variables considered were: wind speed and wind direction from the Scatterometer Climatology of Ocean Winds (SCOW), chlorophyll-a and sea surface temperature from the Moderate Resolution Imaging Spectroradiometer (MODIS), and water depth from the 1 arc-minute global relief model (ETOPO1). To analyse the relationships of these environmental variables with the stranding events, we subdivided the Brazilian coast into 11 boxes, each 3° x 3° in size (1° equal to approximately 110 km) (see [Fig 1](#)). The environmental variables were spatially averaged in each box. In order to capture the environmental conditions that could best reflect the preferred habitat of these pelagic species [12,39–42], the positions of the boxes were chosen so that their central points would be as close as possible to the edge of the continental shelf (ECS).

The extreme northern region (0.5°S– 4°N) was not included in our statistical analyses due to lack of stranding events. Therefore, environmental variables from this area were not included in the dataset. Previous studies suggest that the absence of records in the region might be attributed to environmental forces other than those evaluated in this study, e.g. fluvial discharge [20,43,44].

Additionally, we collected the stomach content of a pregnant *K. breviceps* female found dead on December the 4th, 2005 in Saquarema (Rio de Janeiro State) in order to examine and identify remaining prey items with taxonomic relevance. In the stomach we found cephalopod beaks, which we used to identify the species and to estimate mantle lengths (mm) and weights (g), based on upper and lower rostral lengths (mm), following the method by Clarke [45], Santos [46], and Xavier and Cherel [47]. All the measurements were undertaken using a stereomicroscope with ocular micrometer and precision of 0.1 mm. The relative importance of prey taxa for the diet of the specimen assessed was estimated by calculating the percentage of a prey relative to each species number (FN%) in relation to the total number of prey consumed [48]. Moreover, in order to evaluate the diet composition and ecological aspects of these species, we surveyed the literature for information concerning the stomach content of *Kogia* found in Brazilian waters.

## Statistical analyses

In order to explore the spatial distribution of the stranding events and examine for trends or dissimilarities between the two species along the Brazilian coast, a synoptic exploratory map was produced using the software QGIS (version 2.6.1. Brighton).

A Principal Component Analysis (PCA) was then applied as a preliminary investigation for potential correlations between stranding events and environmental data. PCA is one of the most frequently used multivariate statistical techniques, which consists in an orthogonal

transformation of a set of observations of possibly correlated variables into a set of linearly uncorrelated variables called principal components, PCs [49]. The magnitude of each eigenvalue is interpreted as the amount of variability explained by the first PCs. With this multivariate analysis one can quantify the effect of each variable on each PC, which is known as the loading or eigenvector. The loadings provide an indication of the magnitude and sign of the correlation (i.e. positive or negative) between the original variables and the specific principal component.

To further explore associations among variables, we performed a multiple regression analysis using the Generalized Linear Model (GLM) method to evaluate the changes in the number of stranding events with respect to the selected environmental variables: wind speed (Wspe), wind direction (Wdir), chlorophyll-a (Chl-a), sea surface temperature (SST), and water depth (Depth). Preliminary results of the GLM regression based on a Poisson distribution showed an overdispersion of the data when running the analyses for the *K. sima* (KS) and for the total number of stranding events (TN). Therefore, the models were fitted considering a negative binomial distribution with a log link function. For *K. breviceps* (KB) the models were built based on a Poisson distribution. We first analysed the relationship between numbers of stranding (for each *Kogia* species, respectively, KS and KB, and also for both species combined, TN) and each separated environmental variable. In a second step, we evaluated which combination of environmental variables best described the observed number of strandings by fitting different probabilistic models and by selecting the preferred one using the Akaike's Information Criterion (AIC). The AIC method provides a measure of the quality of a statistical model by balancing goodness of fit versus model complexity [50]. According to this criterion the preferred model is the one that has the lowest AIC value.

All the statistical analyses were carried out using R (The R Foundation for Statistical Computing, Vienna, Austria, v.3.1.3) and with the package 'MASS'.

## Results

In the time period from 1965 to 2014, 100 stranding events of the genus *Kogia* were recorded along the Brazilian coast. From these occurrences, 58 involved the species *K. sima* and 42 the species *K. breviceps*. The stranding events covered a coastal region from 2°S to 33°S, and were especially abundant in the southern- and northern-most parts of this region (Fig 1). No *Kogia* stranding events have been recorded to date in the extreme northern region from 0° to 4°N, although an extensive dedicated survey has been carried out there over the last seven years (Fig 1). The strandings of KB were concentrated around the southern portion of the Brazilian coast, while KS carcasses were distributed more homogeneously (Fig 1). The four southernmost boxes (08–11, Fig 1) contained 66.7% (n = 28) of the total stranding records of KB, while KS stranding events were comparatively less frequent in this area, accounting for 37.9% (n = 31) of the total stranding records of this species. Furthermore, 31 stranding events of KS, 53.4% of the total of this species, occurred in the four northernmost boxes (04–01, Fig 1).

The temporal variability of the stranding events was highly variable. For KS, a peak was clearly identified in the austral summer (January and February) and austral winter (June and July), while for KB peaks occurred in January, May and September (Fig 1).

The PCA analysis showed that the first two principal components (PCs) explain over 80% of the total variance, with first PC explaining 55.1% and second PC explaining 25.84% (Fig 2). The loadings of each variable revealed that KB, TN, Chl-a, Depth, Wspe, and SST are strongly correlated with the first PC (loading values higher than 0.7), with SST being the only variable showing a negative correlation with PC1 (Fig 2). KS, TN, and Wdir are correlated with the second PC (loading values higher than 0.6), with Wdir showing a negative correlation with the second PC, although this component does not explain much of the variance.

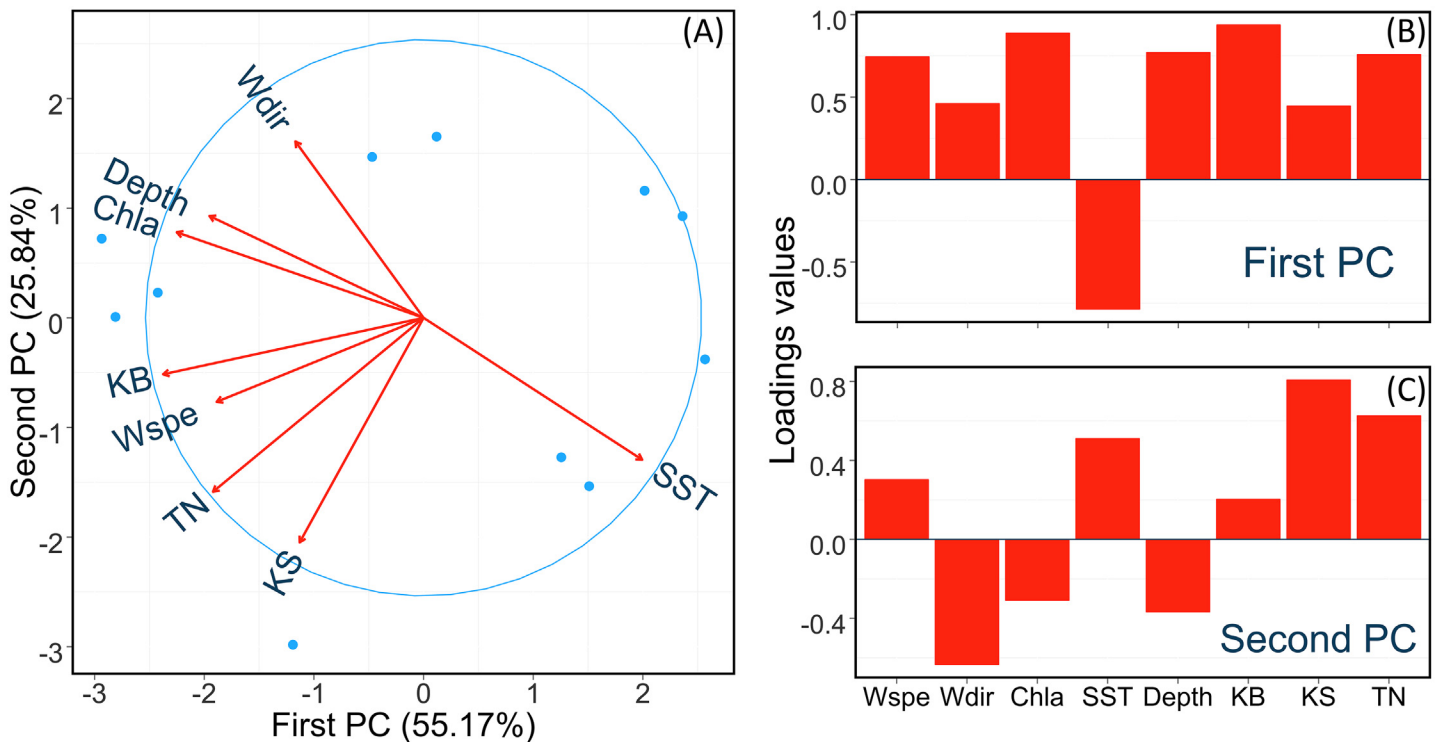

**Fig 2. Principal Component Analysis.** Panel A shows the ordination biplot. The arrows indicate the loadings on the respective PCs. The length of the arrows indicates the power of the relationship and the angle between two arrows provides the degree of correlation between the corresponding variables. Panels B and C show barplots of the loadings illustrating the sign and the strength of the relationships between variables and first (B) and second (C) PCs.

doi:10.1371/journal.pone.0146108.g002

The effects of each environmental variable on the stranding events were investigated using GLM regression. First, we assessed the effects of each environmental variable on stranding events (S2 Table and Fig 3). Both TN and KB showed a positive and significant relationship with Wspe ( $p < 0.01$ ). The same relationship was observed between KS and Wspe, although with less significance ( $p = 0.0541$ ). No further significant associations were observed for TN and KS. However, most variables, except Wdir, were significantly associated with KB. These associations with KB were positive for Chl-a, Depth, and Wspe, and negative for SST. These results indicate that the stranding events of KB are more likely to occur in coastal regions adjacent to highly productive and temperate waters with high wind intensity and broader continental shelves (i.e. shallower areas; Fig 1). Second, we examined the combined effects of the environmental variables on the stranding events by running a series of additive GLM models (Table 1 and S3 Table). The preferred GLM models for TN and KB were similar; both sharing a positive and significant relationship with Wspe and Chl-a, but the preferred model for TN also included SST as a predictor. According to the AIC, the preferred model for predicting the stranding events of KS included a positive association with Wspe, SST and Depth (Table 1). However, regression with Depth produced a considerable small slope and was not statistically significant, indicating a low predictive power of this variable on KS strandings. Wind direction resulted insignificant both in the single and in the combined effect models. Being relevant in all preferred models, wind speed is an important predictor of the stranding events of both species (Table 1). Furthermore, KB carcasses are more likely found in regions adjacent to waters with relatively high Chl-a, whereas KS carcasses are more likely found in regions adjacent to relatively warmer waters. Subsequent important models, i.e. models with very close AIC scores,

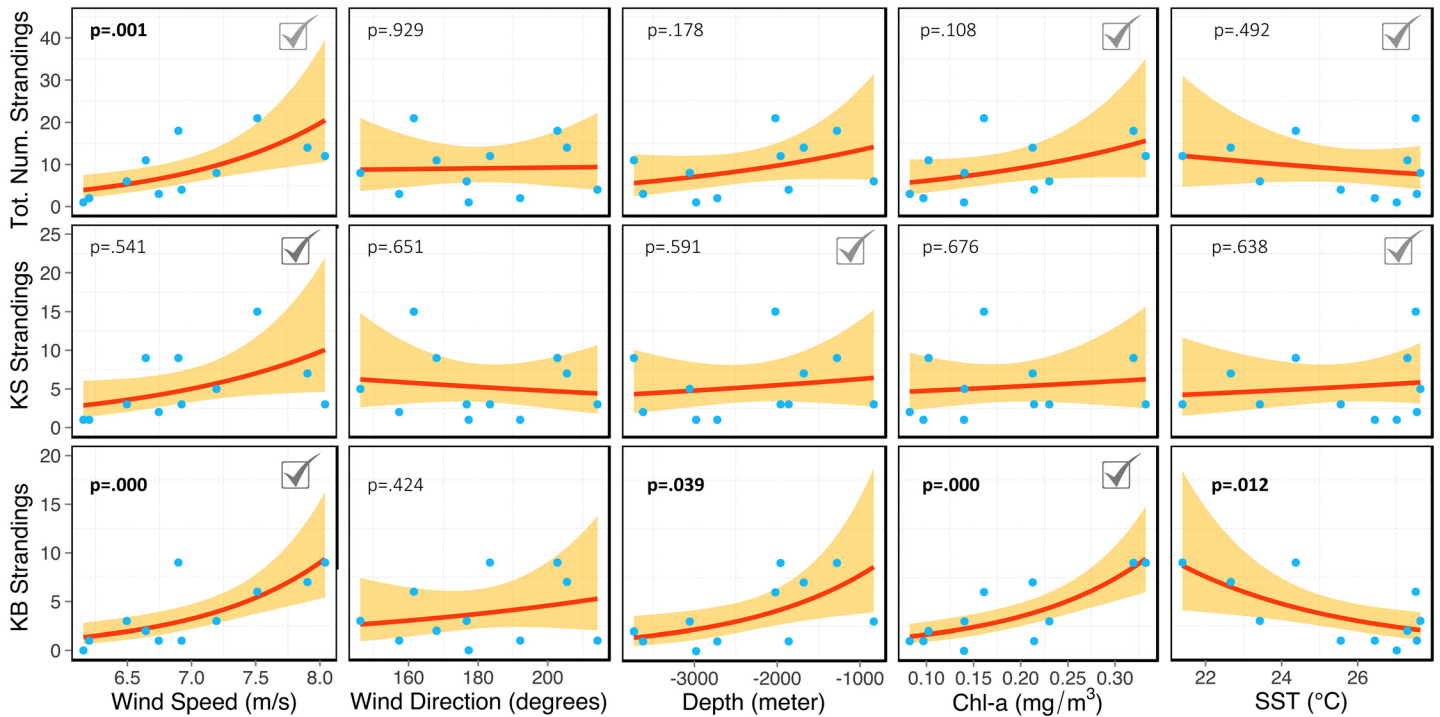

**Fig 3. Probabilistic model fits.** Each panel includes stranding data (blue dots), probabilistic fits based on Generalized Linear Models (red lines), 95% confidence intervals of the fit (shaded yellow areas) respective p-values (significance at  $p < 0.05$ , showed in boldface). The check mark symbols indicate the relevant variables of the selected predictive GLM models for *K. breviceps* (KB), *K. sima* (KS) and for total number of strandings (TN, both species combined).

doi:10.1371/journal.pone.0146108.g003

suggest that  $W_{spe}$  alone is a good predictor for TN (S3 Table). For KS the second best model includes Chl-a and SST but not Depth, and the third best considers only Chl-a and SST (S3 Table). For KB the second most relevant model, includes Depth. The GLM modelling indicates that single models, i.e. models that included each predictor variable separately, were not sufficient to predict the variation in the stranding data.

At least 56 prey specimens of cephalopods were recovered from the stomach content of a pregnant KB female stranded in Saquarema, Rio de Janeiro state (Table 2). We found that

**Table 1. Summary statistics for preferred model fits.** A series of models with associated Akaike's Information Criterion (AIC) indices are reported along with parameters estimates for intercept " $\alpha$ " and slope " $\beta$ ", their respective standard error, and p-values (\* indicates  $p < 0.05$ ).

| Species | AIC    | Parameter       | Estimate $\pm$ SE     | p-value |
|---------|--------|-----------------|-----------------------|---------|
| TN      | 69.709 | $\alpha$        | -10.9993 $\pm$ 4.6259 | 0.0174* |
|         |        | $\beta_{Wspe}$  | 0.8795 $\pm$ 0.3004   | 0.0034* |
|         |        | $\beta_{Chl-a}$ | 6.1791 $\pm$ 3.1823   | 0.0521  |
|         |        | $\beta_{SST}$   | 0.2255 $\pm$ 0.1221   | 0.0648  |
| KB      | 45.666 | $\alpha$        | -4.1109 $\pm$ 1.9254  | 0.0328* |
|         |        | $\beta_{Wspe}$  | 0.6108 $\pm$ 0.2916   | 0.0362* |
|         |        | $\beta_{Chl-a}$ | 5.0874 $\pm$ 2.1536   | 0.0182* |
| KS      | 61.336 | $\alpha$        | -1.0270 $\pm$ 3.9640  | 0.0096* |
|         |        | $\beta_{Wspe}$  | 0.8632 $\pm$ 0.3226   | 0.0074* |
|         |        | $\beta_{SST}$   | 0.2622 $\pm$ 0.1076   | 0.0148* |
|         |        | $\beta_{depth}$ | 0.00039 $\pm$ 0.00026 | 0.1322  |

doi:10.1371/journal.pone.0146108.t001



**Table 2. Food items recovered from the stomach of a stranded pygmy sperm whale (*K. breviceps*).** FN% = (number of preys of one species x 100) / (number of preys of all species); ML = mantle length; WT = weight.

| Family            | Species                           | (N) | ML (mm) |             | WT (g) |              | FN%   |
|-------------------|-----------------------------------|-----|---------|-------------|--------|--------------|-------|
|                   |                                   |     | mean    | range       | mean   | range        |       |
| Ancistrocheiridae | <i>Ancistrocheirus lesueuri</i>   | 5   | 265.4   | 261.4–269.5 | 356.5  | 333.5–379.6  | 8.93  |
| Histoteuthidae    | <i>Histoteuthis corona corona</i> | 5   | 129.9   | 109.3–158.0 | 673    | 357.2–1150.1 | 8.93  |
|                   | <i>Histoteuthis macrohista</i>    | 2   | 97.5    | –           | 202.7  | –            | 3.57  |
|                   | <i>Histoteuthis</i> sp.           | 5   | 38.4    | 30.8–39.7   | 36.7   | 24.4–67.2    | 8.93  |
| Ommastrephidae    | <i>Ornithoteuthis antillarum</i>  | 3   | 144.8   | 131.9–156.6 | 38.8   | 31.2–46.1    | 5.36  |
|                   | <i>Illex argentinus</i>           | 1   | 343.6   | –           | 735.9  | –            | 1.78  |
| Enoploteuthidae   | <i>Abralia</i> sp.                | 1   | –       | –           | –      | –            | 1.78  |
|                   | <i>Enoploteuthis</i> sp.          | 2   | –       | –           | –      | –            | 3.57  |
| Cranchiidae       | <i>Megalocranchia maxima</i>      | 12  | 234.0   | 106.2–283.4 | 61.4   | 12.3–81.9    | 21.42 |
|                   | <i>Taonius</i> sp.                | 1   | –       | –           | –      | –            | 1.78  |
| Chiroteuthidae    | <i>Chiroteuthis</i> sp.           | 7   | 103.9   | 94.6–109.2  | 28.8   | 21.4–33.2    | 12.50 |
| Octopoteuthidae   | <i>Octopoteuthis</i> sp.          | 2   | 116.6   | 110.5–122.6 | 97.6   | 86.0–109.3   | 3.57  |
| Oegopsina         | <i>Oegopsina</i> unidentified     | 10  | –       | –           | –      | –            | 17.86 |

doi:10.1371/journal.pone.0146108.t002

*Megalocranchia maxima* was the most representative prey item (n = 12; FN% = 21.4), followed by a species from the genus *Chiroteuthis* (n = 7; FN% = 12.5). These two cephalopod species, in addition to unidentified items (n = 10) of the suborder *Oegopsina*, represented 51.7% of the total food content. We also found five specimens of *Ancistrocheirus lesueuri*, *Histoteuthis corona corona* and an unidentified species of the genus *Histoteuthis*. The most important prey species in terms of biomass was *Histoteuthis corona corona*, with an estimated mean weight of 673 g (range: 357.2–1150.1 g), and *Ancistrocheirus lesueuri* with an estimated mean weight of 356 g (range: 333.5–379.6 g).

## Discussion

The relatively common and wide-ranging occurrence of *Kogia* strandings provides a unique opportunity to increase knowledge of these species that are difficult to study at sea [2,4,5,51]. A comparative study carried out in Hawaii, for example, demonstrated that *Kogia* whales have significantly higher frequency of stranding when compared to free-ranging observation at sea [52]. Overall, our results suggest that *Kogia* species are relatively common in Brazilian waters, despite the rare sightings at sea. The spatial distribution of strandings appears to be rather heterogeneous throughout the Southwest Atlantic coast. No specimen of the genus *Kogia* has been found stranded in the northernmost regions of Brazil, French Guiana, Trinidad and Tobago, Suriname, and Guyana [20,53]. However, a few records have been reported in the Venezuelan coast [54]. The absence of *Kogia* data for the northern region of Brazil has been associated to the fresh water and sediment discharge from the Amazon and Orinoco rivers, which might prevent drifting carcasses to strand by pushing them offshore [20]. Furthermore, the river outflow combined with the broad continental shelf of the Amazon region might impede living *Kogia* to approach the coast and thus reducing the probability of stranding. The Amazon River, in fact, produces a mean average fluvial discharge of 175,000 m<sup>3</sup> s<sup>-1</sup>, which has an important effect on the marine biodiversity of that region [55]. Studies on the biogeography of pelagic dolphins (e.g. genus *Stenella* and *Delphinus* sp.) reported data with similar gaps [43,44,56], thus lending further weight to the possibility that stranding of cetaceans are less likely to occur in the Amazon coastal region. Siciliano et al. [53] compiled stranding data of aquatic mammals

for the northern coast of Brazil and reported a high prevalence of inshore dolphins (e.g. *Sotalia guianensis*) in this region.

Both *Kogia* species have overlapping habitats, but some latitudinal discrepancy in their distribution has been previously reported [5]. The significant correlations between *K. breviceps* and high chlorophyll-*a* concentration and, to a less extent, lower sea surface temperature, corroborate the knowledge that this species exhibits a preference for productive subtropical and temperate waters [2,4,5]. This is consistent with the fact that the highest frequency of strandings occurred in the southern portion of the studied region, which is associated with the Brazil-Malvinas Confluence (BMC) and the upwelling systems of Cabo Frio and South Brazil Bight (Figs 1 and 3) [57–59]. Moreover, the broader continental shelf in southern Brazil is a potential explanation for the observed significant relationship between lower depth and number of strandings of *K. breviceps*, although this was only detected by the single GLM model approach (Figs 1 and 3). Contrasting results were found for *K. sima*, which strandings were associated to higher sea surface temperature and showed no significant correlation with chlorophyll-*a*, thus supporting the preference of this species for a more tropical habitat (Table 1). This conclusion is based on the higher number of strandings of *K. sima* in the northern regions (Fig 1), which are characterized by warm and low productivity waters [32]. These results are in line with the current knowledge about habitat preferences of these species [4,5,11,12,30]. Also consistent to previous studies, some *K. sima* carcasses have been found stranded at the southern limit of the Brazilian coast, but only stranding of *K. breviceps* have been reported in more temperate waters, further south along the Southwest American coast, including the coasts of Uruguay and Argentina [20,60]. Our results also show that the environmental variable most strongly correlated with stranding events is wind speed (Figs 2 and 3, Table 1). This is not surprising given the important effect that wind speed can have on drifting carcasses and probably on debilitated whales, given that a considerable proportion of the strandings involved impaired living individuals of *K. breviceps* (19.1%) and *K. sima* (22.4%). High incidence of live strandings are commonly described for some regions, such as South Africa (KB: 32.6%; KS: 26.2%) [61] Atlantic and Gulf coast of the U.S. (KB = 33.0%) [62] and New Zealand (KB = 13.0%) [63].

Our analyses on the feeding ecology of *Kogia* species in Brazilian waters are consistent with other studies suggesting deep sea feeding habits and a predominant preference for oceanic cephalopods, although fish and crustaceans are also part of the diet of these cetaceans [2,23,64–66]. The cephalopod families Histioteuthidae and Cranchiidae constituted the main prey species in the diet of the stranded *K. breviceps*. The relevance of these organisms for the dietary composition of *K. breviceps* and *K. sima*, have been confirmed by several studies carried out in different regions of the world, including Hawaii [66], Northeast Atlantic [64] and U.S. mid-Atlantic coast [67]. The cephalopods prey species we found in the stranded individual have a large distributional range and occupy both mesopelagic and bathypelagic ocean zones. This is consistent with literature data from the Brazilian coast (summarised in Table 3) indicating similar diets for both *Kogia* species. Recently, also a study carried out in the U.S. mid-Atlantic [67] suggested that both species present similar feeding ecologies and occupy equivalent trophic niches. However, our regression analysis shows that environmental variables such as chlorophyll and sea surface temperature may have a dissimilar influence on the latitudinal distribution of the two species, pointing to different feeding habits.

## Conclusions

We investigated the stranding patterns of two rare *Kogia* species based on a number of predictive environmental variables. *K. sima* shows a preference for warm waters of the northeastern Brazilian coast, whereas, *K. breviceps* exhibits a preference for temperate and productive waters.

**Table 3. Literature information concerning cephalopod prey species recovered in stomach contents of *K. sima* and *K. breviceps* stranded along the Brazilian coast.**

| Family of prey species | Prey species                        | <i>K. sima</i> | <i>K. breviceps</i> | References        |
|------------------------|-------------------------------------|----------------|---------------------|-------------------|
| Sepioliidae            | <i>Semirossia tenera</i>            | Y              | -                   | [23]              |
|                        | <i>Heteroteuthis dispar</i>         | Y              | Y                   | [23]              |
|                        | <i>Heteroteuthis atlantis</i>       | Y              | Y                   | [23,68]           |
| Lycoteuthidae          | <i>Lycoteuthis lorigera</i>         | Y              | Y                   | [23]              |
|                        | <i>Lycoteuthis diadema</i>          | -              | Y                   | [69]              |
| Enoploteuthidae        | <i>Abralia redfieldi</i>            | Y              | -                   | [23]              |
|                        | <i>Abralia veranyi</i>              | -              | Y                   | [24]              |
|                        | <i>Abralia</i> sp.                  | -              | Y                   | [TS]              |
|                        | <i>Enoploteuthis</i> sp.            | -              | Y                   | [69, TS]          |
| Octopoteuthidae        | <i>Octopoteuthis</i> sp.            | Y              | Y                   | [30,70,71, TS]    |
| Onychoteuthidae        | <i>Moroteuthis ingens</i>           | Y              | -                   | [23]              |
|                        | <i>Moroteuthis robsoni</i>          | Y              | Y                   | [23]              |
|                        | <i>Onychoteuthis banksii</i>        | -              | Y                   | [70]              |
| Histiotheuthidae       | <i>Histiotheuthis corona corona</i> | -              | Y                   | [TS]              |
|                        | <i>Histiotheuthis macrohista</i>    | -              | Y                   | [TS]              |
|                        | <i>Histioteuthis</i> spp.           | Y              | Y                   | [30,67,70,71, TS] |
| Ommastrephidae         | <i>Illex argentinus</i>             | Y              | Y                   | [30,68,71, TS]    |
|                        | <i>Ornithoteuthis antillarum</i>    | Y              | Y                   | [30, TS]          |
|                        | <i>Ommastrephes bartramii</i>       | -              | Y                   | [71]              |
| Chiroteuthidae         | <i>Chiroteuthis veranyi</i>         | Y              | Y                   | [23,71,72]        |
|                        | <i>Chiroteuthis</i> sp.             | Y              | Y                   | [TS]              |
| Cranchiidae            | Unknown                             | Y              | -                   | [23]              |
|                        | <i>Megalocranchia maxima</i>        | -              | Y                   | [TS]              |
|                        | <i>Liocranchia reinhardti</i>       | -              | Y                   | [24]              |
|                        | <i>Taonius</i> sp.                  | -              | Y                   | [TS]              |
| Bolitaenidae           | <i>Japetella diaphana</i>           | Y              | -                   | [23,72]           |
| Mastigoteuthidae       | <i>Mastigoteuthis</i> sp.           | -              | Y                   | [70]              |
| Alloposidae            | <i>Haliphron atlanticus</i>         | -              | Y                   | [24]              |
| Neoteuthidae           | <i>Neoteuthis thielei</i>           | -              | Y                   | [70]              |
| Ancistrocheiridae      | <i>Ancistrocheirus lesueurii</i>    | -              | Y                   | [TS]              |

TS = This Study; Y = Yes.

doi:10.1371/journal.pone.0146108.t003

The most important environmental predictor explaining the stranding events is wind speed. This variable, however, may have a strong postmortem effect on drifting carcasses and on debilitated whales. Consistently with previous findings, our results on feeding ecology indicate a preference of *Kogia* species for oceanic cephalopods. Additionally, the lack of stranding events in the Amazon coast suggests that strong river outflow and discharge might prevent drifting carcasses to strand by pushing them offshore. By using the available information as a qualitative proxy for habitat preference and trophic ecology in association to environmental variables, our work provides a comprehensive assessment of *Kogia* stranding data along the Brazilian coast. Our findings also highlight the scientific value of stranding monitoring programmes to better understand the impacts of environmental conditions on marine mammals and their vulnerabilities to changes.

## Supporting Information

**S1 Table. Stranding data of genus *Kogia* along the Brazilian coast.** KS = *Kogia sima*; KB = *Kogia breviceps*.  
(DOCX)

**S2 Table. Summary statistics of the Generalized Linear Model method for the single effect of each environmental variable on *Kogia* strandings.** Reported are parameter estimates ( $\pm$  standard error) for intercept “ $\alpha$ ” and slope “ $\beta$ ” of each model. Corresponding p-values are  $p < 0.05$  for \*,  $p < 0.01$  for \*\*, and  $p < 0.001$  for \*\*\*.  
(DOCX)

**S3 Table. Model selection from a series of additive models.** The selection is based on the Akaike’s Information Criterion (AIC) and Akaike’s Weights ( $W_{AIC}$ ). The best models are the one that have the lowest AIC and highest  $W_{AIC}$ , here highlighted in bold and with superscript (1). The second and third subsequent most important models according to AIC are indicated with superscripts (2) and (3), respectively.  
(DOCX)

## Acknowledgments

We would like to thank the field researchers related to the data collection for providing valuable information for the realisation of the scientific work. We also thank the Brazilian environmental agencies IBAMA (Brazilian Institute of Environment and Renewable Natural Resources) and ICMBio (Chico Mendes Institute for Biodiversity Conservation) that intensively contributed with regulations, research permission and logistical support to conduct the beach surveys. We also thank all members from the Study Group of Aquatic Mammals of Rio Grande do Sul (GEMARS), who kindly conducted beach surveys contributing with data analysed in this study. A. C. O. Meirelles thanks Project Manatí for the contribution of the *Kogia* data. Specially thanks to Prof. Dr. Eduardo Secchi who cordially contributed with valuable data for conducting this study.

## Author Contributions

Conceived and designed the experiments: JFM EAT AM. Performed the experiments: JFM EAT. Analyzed the data: JFM EAT LRO DCT. Contributed reagents/materials/analysis tools: JFM RAS SS RM JCW CPNS LRO ACOM DCT. Wrote the paper: JFM AM. Performed the molecular identification of the whales: LRO. Provided the taxonomic identification of the cephalopods prey items: RAS. Provided data and comprehensive interpretation of the results: ACOM CPNS LRO RAS JCW RM SS.

## References

1. Handley CO (1966) A synopsis of the genus *Kogia* (pygmy sperm whales). In: Norris K, editor. Whales, dolphins, and porpoises. California: University of California Press. pp. 63–69.
2. Ross GJB (1979) Records of pygmy and dwarf sperm whales genus *Kogia* from Southern Africa with biological notes and some comparisons. *Ann Cape Prov Museums Nat Hist* 11: 259–327.
3. Chivers SJ, Leduc RG, Robertson KM, Barros NB, Dizon AE (2005) Genetic variation of *Kogia* spp. with preliminary evidence for two species of *Kogia sima*. *Mar Mammal Sci* 21: 619–634. doi: [10.1111/j.1748-7692.2005.tb01255.x](https://doi.org/10.1111/j.1748-7692.2005.tb01255.x)
4. McAlpine DF (2009) Pygmy and dwarf sperm whales. In: Perrin WF, Würsig B, Thewissen JGM, editors. *Encyclopedia of Marine Mammals*. California: Elsevier Academic Press. pp. 936–938.

5. Caldwell DK, Caldwell MC (1989) Pygmy sperm whale *Kogia breviceps* (de Blainville, 1838): dwarf sperm whale *Kogia simus* (Owen, 1866). In: Ridgway SH, Harrison SR, editors. Handbook of Marine Mammals: River dolphins and the larger toothed whales. London: Academic Press. pp. 235–260.
6. Barlow J (1999) Trackline detection probability for long-diving whales. In: Garner GW, Amstrup SC, Laake JL, Manly BFJ, McDonald LL, Robertson DG, editors. Marine Mammals Survey and Assessment Methods. Rotterdam: AA Balkema. pp. 209–221.
7. Waring GT, Josephson E, Maze-Foley K, Rosel PE (2012) U.S. Atlantic and Gulf of Mexico marine mammal stock assessments—2011. Massachusetts: NOAA Technical Memorandum NMFS-NE-221. 319 p.
8. Geraci JR, Lounsbury VJ (2005) Marine mammals ashore: a field guide for strandings. 2nd ed. Baltimore, MD: National Aquarium in Baltimore. 239 p.
9. Reynolds JE, Marsh H, Ragen TJ (2009) Marine mammal conservation. *Endanger Species Res* 7: 23–28. doi: [10.3354/esr00179](https://doi.org/10.3354/esr00179)
10. Gulland FMD, Hall AJ (2007) Is marine mammal health deteriorating? Trends in the global reporting of marine mammal disease. *Ecohealth* 4: 135–150. doi: [10.1007/s10393-007-0097-1](https://doi.org/10.1007/s10393-007-0097-1)
11. Nagorsen D (1985) *Kogia simus*. *Mamm Species* 239: 1–6.
12. Bloodworth BE, Odell DK (2008) *Kogia breviceps* (Cetacea: Kogiidae). *Mamm Species* 819: 1–12. doi: [10.1644/819.1](https://doi.org/10.1644/819.1)
13. Wilkinson D, Worthy GAJ (1999) Marine mammal stranding networks. In: Twiss JR, Reeves RR, editors. Conservation and Management of Marine Mammals. Washington DC: Smithsonian Institution Press. pp. 396–411.
14. Truchon MH, Measures L, L'Hérault V, Brêthes JC, Galbraith PS, Harvey M, et al. (2013) Marine mammal strandings and environmental changes: a 15-year study in the St. Lawrence ecosystem. *PLoS One* 8. doi: [10.1371/journal.pone.0059311](https://doi.org/10.1371/journal.pone.0059311)
15. Wright AJ, Maar M, Mohn C, Nabe-Nielsen J, Siebert U, Jensen LF, et al. (2013) Possible causes of a harbour porpoise mass stranding in Danish waters in 2005. *PLoS One* 8. doi: [10.1371/journal.pone.0055553](https://doi.org/10.1371/journal.pone.0055553)
16. Meager JJ, Limpus C (2014) Mortality of inshore marine mammals in eastern Australia is predicted by freshwater discharge and air temperature. *PLoS One* 9. doi: [10.1371/journal.pone.0094849.g005](https://doi.org/10.1371/journal.pone.0094849.g005)
17. Peltier H, Jepson PD, Dabin W, Deaville R, Daniel P, Van Canneyt O, et al. (2014) The contribution of stranding data to monitoring and conservation strategies for cetaceans: Developing spatially explicit mortality indicators for common dolphins (*Delphinus delphis*) in the eastern North-Atlantic. *Ecol Indic* 39: 203–214. Available: <http://dx.doi.org/10.1016/j.ecolind.2013.12.019>
18. Evans K, Thresher R, Warneke RM, Bradshaw CJA, Pook M, Thiele D, et al. (2005) Periodic variability in cetacean strandings: links to large-scale climate events. *Biol Lett* 1: 147–150. doi: [10.1098/rsbl.2005.0313](https://doi.org/10.1098/rsbl.2005.0313) PMID: [17148151](https://pubmed.ncbi.nlm.nih.gov/17148151/)
19. Carmichael RH, Graham WM, Aven A, Worthy G, Howden S (2012) Were multiple stressors a “perfect storm” for northern gulf of Mexico bottlenose dolphins (*Tursiops truncatus*) in 2011? *PLoS One* 7. doi: [10.1371/journal.pone.0041155](https://doi.org/10.1371/journal.pone.0041155)
20. Muñoz-Hincapié MF, Mora-Pinto DM, Palacios DM, Secchi ER, Mignucci-Giannoni AA (1998) First osteological record of the dwarf sperm whale in Colombia, with notes on the zoogeography of *Kogia* in South America. *Rev la Acad Columbiana Ciencias* 22: 433–444.
21. Sampaio CLS, Aroucha EC (2000) Registro de cachalote anão, *Kogia Simus* (Owen, 1866) no litoral da Bahia, nordeste do Brasil. *Bioikos* 14: 28–33.
22. Maia-Nogueira R, Baracho CG, Serra SD (2001) Revisão dos Registros do gênero *Kogia* (GRAY, 1846) (Cetacea, Physeteridae, Kogiinae) no litoral do nordeste do Brasil, incluindo dados osteológicos. *Bioikos* 15: 50–59.
23. Santos RA, Haimovici M (2001) Cephalopods in the diet of marine mammals stranded or incidentally caught along southeastern and southern Brazil (21–34°S). *Fish Res* 52: 99–112. doi: [10.1016/S0165-7836\(01\)00234-X](https://doi.org/10.1016/S0165-7836(01)00234-X)
24. Gurjão LM, Furtado-Neto MMA, Santos RA, Cascon P (2003) Notas sobre a dieta de cachalotes (Cetacea: Physeteroidea), encalhados no Ceará, nordeste do Brasil. *Arq Ciências do Mar* 36: 67–75.
25. Souto LRA, Abrão-Oliveira JG, Nunes JACC, Maia-Nogueira R, Sampaio CLS (2007) Análise das mordidas de tubarões-charuto, *Isistius* spp. (Squaliformes: Dalatiidae) em cetáceos (Mammalia: Cetacea) no litoral da Bahia, Nordeste do Brasil. *Biotemas* 20: 19–25.
26. Meirelles ACO, Monteiro-Neto C, Martins AMA, Costa AF, Barros HMDR, Alves MDO (2009) Cetacean strandings on the coast of Ceará, north-eastern Brazil (1992–2005). *J Mar Biol Assoc United Kingdom* 89: 1083. doi: [10.1017/S0025315409002215](https://doi.org/10.1017/S0025315409002215)

27. Souto LRA (2009) Sincranimetria do cachalote-pigmeu, *Kogia breviceps* (Odontoceti, Kogiidae), no litoral da Bahia, nordeste do Brasil. *Sitientibus Série Ciências Biológicas* 9: 129–132.
28. Souto LRA, Lemos LM, Violante THAS, Maia-Nogueira R (2009) Record of a neonate dwarf sperm whale, *Kogia sima* (Owen, 1866) stranded on the coast of Bahia, northeastern Brazil. *Lat Am J Aquat Mamm* 7: 105–106. doi: [10.5597/lajam00146](https://doi.org/10.5597/lajam00146)
29. Santos MCO, Siciliano S, Castro Vicente AF, Alvarenga FS, Zampirolli É, Souza SP, et al. (2010) Cetacean records along São Paulo state coast, Southeastern Brazil. *Brazilian J Oceanogr* 58: 123–142. doi: [10.1590/S1679-87592010000200004](https://doi.org/10.1590/S1679-87592010000200004)
30. Jefferson TA, Webber MA, Pitman RL (2008) Marine mammals of the world: a comprehensive guide to their identification. 2nd ed. San Diego: Academic Press. 415 p. doi: [10.1578/AM.35.3.2009.414](https://doi.org/10.1578/AM.35.3.2009.414)
31. Silveira ICA, Schmidt ACK, Campos EJD, Godoi SS, Ikeda Y (2000) A corrente do Brasil ao largo da costa leste brasileira. *Brazilian J Oceanogr* 48: 171–183
32. Pereira MPS, Justino F, Malhado ACM, Barbosa H, Marengo J (2014) The influence of oceanic basins on drought and ecosystem dynamics in Northeast Brazil. *Environ Res Lett* 9: 1–8. doi: [10.1088/1748-9326/9/12/124013](https://doi.org/10.1088/1748-9326/9/12/124013)
33. Borzone CA, Pezzuto PR, Marone E (1999) Oceanographic characteristics of a multi-specific fishing ground of the Central South Brazil Bight. *Mar Ecol* 20: 131–146. doi: [10.1046/j.1439-0485.1999.00070.x](https://doi.org/10.1046/j.1439-0485.1999.00070.x)
34. Valentin JL (2001) The Cabo Frio upwelling system, Brazil. In: S U, K B, editors. *Coastal Marine Ecosystems of Latin America*. Berlin: Springer—Verlag. pp. 97–105. doi: [10.1007/978-3-662-04482-7\\_8](https://doi.org/10.1007/978-3-662-04482-7_8)
35. Calado L, Gangopadhyay A, Silveira ICA (2008) Feature-oriented regional modeling and simulations (FORMS) for the western South Atlantic: Southeastern Brazil region. *Ocean Model* 25: 48–64. doi: [10.1016/j.ocemod.2008.06.007](https://doi.org/10.1016/j.ocemod.2008.06.007)
36. Bisbal GA (1995) The Southeast South American shelf large marine ecosystem Evolution and components. *Mar Policy* 19: 21–38. doi: [10.1016/0308-597X\(95\)92570-W](https://doi.org/10.1016/0308-597X(95)92570-W)
37. Kocher TD, Thomas WK, Meyer A, Edwards S V, Pääbo S, Villablanca FX, et al. (1989) Dynamics of mitochondrial DNA evolution in animals: amplification and sequencing with conserved primers. *Proc Natl Acad Sci U S A* 86: 6196–6200. doi: [10.1073/pnas.86.16.6196](https://doi.org/10.1073/pnas.86.16.6196) PMID: [2762322](https://pubmed.ncbi.nlm.nih.gov/2762322/)
38. Ivanova N V, Zemlak TS, Hanner RH, Hebert PDN (2007) Universal primer cocktails for fish DNA barcoding. *Mol Ecol Notes* 7: 544–548. doi: [10.1111/j.1471-8286.2007.01748.x](https://doi.org/10.1111/j.1471-8286.2007.01748.x)
39. Davis RW, Fargion GS, May N, Leming TD, Baumgartner M, Evans WE, et al. (1998) Physical habitat of cetaceans along the continental slope in the north-central and western Gulf of Mexico. *Mar Mammal Sci* 14: 490–507. doi: [10.1111/j.1748-7692.1998.tb00738.x](https://doi.org/10.1111/j.1748-7692.1998.tb00738.x)
40. Willis PM, Baird RW (1998) Status of the dwarf sperm whale, *Kogia simus*, with special reference to Canada. *Can Field-Naturalist* 112: 114–125.
41. Baumgartner MF, Mullin KD, May LN, Leming TD (2001) Cetacean habitats in the northern Gulf of Mexico. *Fish Bull* 99: 219–239
42. Garrison LP, Swartz SL, Martinez A, Burks C, Stamates J (2003) A marine mammal assessment survey of the Southeast US Continental Shelf. NOAA, NMFS-SEFSC-492, Florida, USA. 50 p.
43. Moreno IB, Zerbini AN, Danilewicz D, Santos MCDO, Simões-lobes PC, Lailson-brito J, et al. (2005) Distribution and habitat characteristics of dolphins of the genus *Stenella* (Cetacea: Delphinidae) in the southwest Atlantic Ocean. *Mar Ecol Prog Ser* 300: 229–240. doi: [10.3354/meps300229](https://doi.org/10.3354/meps300229)
44. Jefferson TA, Fertl D, Bolaños-Jiménez J, Zerbini AN (2009) Distribution of common dolphins (*Delphinus* spp.) in the western Atlantic Ocean: a critical re-examination. *Mar Biol* 156: 1109–1124. doi: [10.1007/s00227-009-1152-y](https://doi.org/10.1007/s00227-009-1152-y)
45. Clarke MR (1986) *A Handbook for the identification of cephalopod beaks*. Oxford: Clarendon Press.
46. Santos RA (1999) *Cefalópodes nas relações tróficas do sul do Brasil* (PhD Thesis). Rio Grande do Sul: FURG—Fundação Universidade Federal do Rio Grande. 199 p.
47. Xavier JC, Cherel Y (2009) *Cephalopod beak guide for the Southern Ocean*. Cambridge: British Antarctic Survey. 129 p.
48. Lopes XM, Silva E, Bassoi M, Santos RA, Santos MCO (2012) Feeding habits of Guiana dolphins, *Sotalia guianensis*, from south-eastern Brazil: new items and a knowledge review. *J Mar Biol Assoc United Kingdom* 92: 1723–1733. doi: [10.1017/S0025315412000495](https://doi.org/10.1017/S0025315412000495)
49. Quinn GP, Keough MJ (2002) *Experimental design and data analysis for biologists*. Cambridge: Cambridge University Press. 537 p.
50. Akaike H (1974) A new look at the statistical model identification. *IEEE Trans Automat Contr* AC-19: 716–723. doi: [10.1109/TAC.1974.1100705](https://doi.org/10.1109/TAC.1974.1100705)

51. Byrd BL, Hohn AA, Lovewell GN, Altman KM, Barco SG, Friedlaender AS, et al. (2014) Strandings as indicators of marine mammal biodiversity and human interactions off the coast of North Carolina. *Fish Bull* 112: 1–23. doi: [10.7755/FB.112.1.1](https://doi.org/10.7755/FB.112.1.1)
52. Maldini D, Mazzuca L, Atkinson S (2005) Odontocete stranding patterns in the main Hawaiian Islands (1937–2002): how do they compare with live animal surveys? *Pacific Sci* 59: 55–67. doi: [10.1353/psc.2005.0009](https://doi.org/10.1353/psc.2005.0009)
53. Siciliano S, Emin-lima NR, Costa AF, Rodrigues ALF, Magalhães FA, Tosi CA, et al. (2008) Revisão do conhecimento sobre os mamíferos aquáticos da costa norte do Brasil. *Arq do Mus Nac* 66: 1–21.
54. Bermúdez-Villapol LA, Sayegh A, León T (2008) Notes on the confirmation of the Dwarf sperm whale *Kogia sima* Owen, 1866 (Cetacea: Kogiidae) on Venezuelan coasts. *Rev Científica UDO Agrícola* 8: 154–162.
55. Rocha L a (2003) Patterns of distribution and precess of speciation in Brazilian reef fishes. *J Biogeogr* 30: 1161–1171
56. Fertl D, Jefferson TA, Moreno IB, Zerbini AN, Mullin KD (2003) Distribution of the Clymene dolphin *Stenella clymene*. *Mamm Rev* 33: 253–271. doi: [10.1046/j.1365-2907.2003.00033.x](https://doi.org/10.1046/j.1365-2907.2003.00033.x)
57. Garcia CAE, Sarma YVB, Mata MM, Garcia VMT (2004) Chlorophyll variability and eddies in the Brazil–Malvinas Confluence region. *Deep Sea Res Part II Top Stud Oceanogr* 51: 159–172. doi: [10.1016/j.dsr2.2003.07.016](https://doi.org/10.1016/j.dsr2.2003.07.016)
58. Machado I, Barreiro M, Calliari D (2013) Variability of chlorophyll-a in the Southwestern Atlantic from satellite images: Seasonal cycle and ENSO influences. *Cont Shelf Res* 53: 102–109. doi: [10.1016/j.csr.2012.11.014](https://doi.org/10.1016/j.csr.2012.11.014)
59. Palma ED, Matano RP (2009) Disentangling the upwelling mechanisms of the South Brazil Bight. *Cont Shelf Res* 29: 1525–1534. doi: [10.1016/j.csr.2009.04.002](https://doi.org/10.1016/j.csr.2009.04.002)
60. Bastida R, Rodríguez D (2003) *Mamíferos marinos de Patagonia y Antartida*. Buenos Aires: Vazquez Mazzini. 207 p.
61. Plön S (2004) The status and natural history of pygmy (*Kogia breviceps*) and dwarf (*K. sima*) sperm whales off Southern Africa Rhodes University, South Africa.
62. Mead JG (1979) An analysis of cetacean strandings along the eastern coast of the United States. Geraci J, Aubin DJ, editors Washington: U.S. Marine Mammal Commission. 54–68 p.
63. Brabyn MW (1991) An analysis of the New Zealand whale stranding record. *Science & Research Series* 29, National Library of New Zealand, Wellington. 47p.
64. Santos MB, Pierce GJ, López A, Reid RJ, Ridoux V, Mente E (2006) Pygmy sperm whales *Kogia breviceps* in the Northeast Atlantic: New information on stomach contents and strandings. *Mar Mammal Sci* 22: 600–616. doi: [10.1111/j.1748-7692.2006.00038.x](https://doi.org/10.1111/j.1748-7692.2006.00038.x)
65. Beatson E (2007) The diet of pygmy sperm whales, *Kogia breviceps*, stranded in New Zealand: Implications for conservation. *Rev Fish Biol Fish* 17: 295–303. doi: [10.1007/s11160-007-9039-9](https://doi.org/10.1007/s11160-007-9039-9)
66. West KL, Walker WA, Baird RW, White W, Levine G, Brown E, et al. (2009) Diet of pygmy sperm whales (*Kogia breviceps*) in the Hawaiian Archipelago. *Mar Mammal Sci* 25: 931–943. doi: [10.1111/j.1748-7692.2009.00295.x](https://doi.org/10.1111/j.1748-7692.2009.00295.x)
67. Staudinger MD, McAlarney RJ, McLellan WA, Ann Pabst D (2014) Foraging ecology and niche overlap in pygmy (*Kogia breviceps*) and dwarf (*Kogia sima*) sperm whales from waters of the U.S. mid-Atlantic coast. *Mar Mammal Sci* 30: 626–655. doi: [10.1111/mms.12064](https://doi.org/10.1111/mms.12064)
68. Vicente A, Zampirolli E, Alvarenga FS, Pereira TMA, Maranhão A, Santos RA (1998) Registro de cachalote-anão *Kogia simus* Owen, 1866 (Cetacea-Physeteridae) no Estado de São Paulo-Brasil. VIII Reunión de Trabajo de Especialistas em Mamíferos Acuáticos de América del Sur. Olinda, Pernambuco. p. 222.
69. Secchi ER, Campolim MB, Möller LM (1994) Nota sobre o encalhe de dois cachalotes pigmeus *Kogia breviceps* na costa sul do Rio Grande do Sul, Brasil. IV Reunión de Trabajo de Especialistas em Mamíferos Acuáticos de América del Sur. Valdivia, Chile. pp. 244–262.
70. Santos CP, Lodi L (1998) Occurrence of *Anisakis physeteris* Baylis, 1923 and *Pseudoterranova* sp. (Nematoda) in pygmy sperm whale *Kogia breviceps* (De Blainville, 1838) (Physeteridae) in northeastern coast of Brazil. *Mem Inst Oswaldo Cruz* 93: 187–188. doi: [10.1590/S0074-02761998000200009](https://doi.org/10.1590/S0074-02761998000200009) PMID: [9698890](https://pubmed.ncbi.nlm.nih.gov/9698890/)
71. Soto JM, Montibeller A, Santos RA (1999) Análise do conteúdo estomacal de *Kogia breviceps* e *Kogia simus* (Cetacea, Physeteridae), coletados em Santa Catarina, Brasil. XII Semana Nacional de Oceanografia. Rio de Janeiro. pp. 319–321.
72. Zanellato RC, Rosas FCW, Santos RA (1996) Análise do conteúdo estomacal de um cachalote anão *Kogia simus* (Cetacea: Kogiidae), registrado para o litoral do Paraná, Brasil. VII Reunión de Trabajo de Especialistas em Mamíferos Acuáticos de América del Sur. Viña del Mar, Chile. p. 82.
